# Supplementary material
Source: PubMed Central journal article supplement (PMC1693724)
Supplement: pnas_0608907103_1.pdf [file pnas_0608907103_1.pdf]

**A** D<sup>b</sup>NP<sub>366</sub> TCRβ amino acid sequences

| CDR3β              | Jβ  | Number of mice | Number of unique n.t. sequences |
|--------------------|-----|----------------|---------------------------------|
| CASSGGSNTGQLYFGEG  | 2S2 | 19             | 15                              |
| CASSGGANTGQLYFGEG  | 2S2 | 18             | 11                              |
| CASSGGGNTGQLYFGEG  | 2S2 | 16             | 11                              |
| CASRGGANTGQLYFGEG  | 2S2 | 11             | 14                              |
| CASSARTANTEVFFGKGT | 1S1 | 5              | 3                               |
| CASRGGGSNTGQLYFGEG | 2S2 | 5              | 2                               |
| CASKGGANTGQLYFGEG  | 2S2 | 4              | 3                               |
| CASKGGGNTGQLYFGEG  | 2S2 | 3              | 3                               |
| CASKGGSNTGQLYFGEG  | 2S2 | 3              | 2                               |
| CASSDHRNTEVFFGKGT  | 1S1 | 3              | 1                               |
| CASRGGGNTGQLYFGEG  | 2S2 | 2              | 3                               |
| CASRDSANTEVFFGKGT  | 1S1 | 2              | 2                               |
| CASSDSANTEVFFGKGT  | 1S1 | 2              | 2                               |
| CASSGGGRTGQLYFGEG  | 2S2 | 2              | 2                               |
| CASSDHRTTEVFFGKGT  | 1S1 | 2              | 1                               |
| CASSGTGGNYAEQFFGPG | 2S1 | 2              | 1                               |

Highly-shared sequences

**B** D<sup>b</sup>PA<sub>224</sub> TCRβ amino acid sequences

| CDR3β                | Jβ  | Number of mice | Number of unique n.t. sequences |
|----------------------|-----|----------------|---------------------------------|
| CASSFGGEQYFGPGT      | 2S7 | 10             | 5                               |
| CASSSYEQYFGPGT       | 2S7 | 8              | 6                               |
| CASSLGGEQYFGPGT      | 2S7 | 8              | 5                               |
| CASSLGGYEQYFGPGT     | 2S7 | 8              | 4                               |
| CASSWGDEQYFGPGT      | 2S7 | 7              | 2                               |
| CASSLSGYEQYFGPGT     | 2S7 | 6              | 6                               |
| CASSWGGEQYFGPGT      | 2S7 | 6              | 5                               |
| CASSLGGEVFFGKGT      | 1S1 | 6              | 4                               |
| CASSLGERLFFGHG       | 1S4 | 5              | 4                               |
| CASSLDRGEVFFGKGT     | 1S1 | 5              | 3                               |
| CASSFGERLFFGHG       | 1S4 | 5              | 2                               |
| CASSLAGYEQYFGPGT     | 2S7 | 4              | 4                               |
| CASSPDRGEQYFGPGT     | 2S7 | 4              | 4                               |
| CASSLGQAPLFGEG       | 1S5 | 4              | 3                               |
| CASSPDRGEVFFGKGT     | 1S1 | 4              | 3                               |
| CASSFGGEVFFGKGT      | 1S1 | 4              | 2                               |
| CASSSPDTQYFGPG       | 2S5 | 4              | 2                               |
| CASSLDRGQLYFGEG      | 2S2 | 3              | 3                               |
| CASSLSPERLFFGHG      | 1S4 | 3              | 3                               |
| CASSQGGEQYFGPGT      | 2S7 | 3              | 3                               |
| CASSWGSEQYFGPGT      | 2S7 | 3              | 3                               |
| CASSAYEQYFGPGT       | 2S7 | 3              | 2                               |
| CASSEGGEQYFGPGT      | 2S7 | 3              | 2                               |
| CASSFGEAPLFGEG       | 1S5 | 3              | 2                               |
| CASSFGGAPLFGEG       | 1S5 | 3              | 2                               |
| CASSSGGEVFFGKGT      | 1S1 | 3              | 2                               |
| CASSYGAEQFFGPG       | 2S1 | 3              | 2                               |
| CASSLGDEQYFGPGT      | 2S7 | 3              | 1                               |
| CASSLGEAPLFGEG       | 1S5 | 3              | 1                               |
| CASSPDRGRVFFGKGT     | 1S1 | 3              | 1                               |
| CASSSGDEQYFGPGT      | 2S7 | 3              | 1                               |
| CASSWGNEQYFGPGT      | 2S7 | 3              | 1                               |
| CASSFGAEQFFGPG       | 2S1 | 2              | 2                               |
| CASSFGGQLYFGEG       | 2S2 | 2              | 2                               |
| CASSFGQAPLFGEG       | 1S5 | 2              | 2                               |
| CASSGGGEQYFGPGT      | 2S7 | 2              | 2                               |
| CASSGGNTLYFGAG       | 2S4 | 2              | 2                               |
| CASSLDRAEVFFGKGT     | 1S1 | 2              | 2                               |
| CASSLDRGEQYFGPGT     | 2S7 | 2              | 2                               |
| CASSLGAEQFFGPG       | 2S1 | 2              | 2                               |
| CASSLSGEQYFGPGT      | 2S7 | 2              | 2                               |
| CASSLSSRGRDSDYTFGSGT | 1S2 | 2              | 2                               |
| CASSPDRGQVFFGKGT     | 1S1 | 2              | 2                               |
| CASSPGDEQYFGPGT      | 2S7 | 2              | 2                               |
| CASSPGGEQYFGPGT      | 2S7 | 2              | 2                               |
| CASSQGQAPLFGEG       | 1S5 | 2              | 2                               |
| CASSQGTEVFFGKGT      | 1S1 | 2              | 2                               |
| CASSRGQAPLFGEG       | 1S5 | 2              | 2                               |
| CASSSAEQFFGPG        | 2S1 | 2              | 2                               |
| CASSSGERLFFGHG       | 1S4 | 2              | 2                               |
| CASSSGGEQYFGPGT      | 2S7 | 2              | 2                               |
| CASSWDRGTLYFGSG      | 2S3 | 2              | 2                               |
| CASSWGDTQYFGPG       | 2S5 | 2              | 2                               |
| CASSWGEDTQYFGPG      | 2S5 | 2              | 2                               |
| CASSWGERLFFGHG       | 1S4 | 2              | 2                               |
| CASSYGGEVFFGKGT      | 1S1 | 2              | 2                               |
| CASTGGAEQFFGPG       | 2S1 | 2              | 2                               |
| CASTNTGQLYFGEG       | 2S2 | 2              | 2                               |
| CAHLGGNYAEQFFGPG     | 2S1 | 2              | 1                               |
| CARAGTGQDTQYFGPG     | 2S5 | 2              | 1                               |
| CASAGPSEVFFGKGT      | 1S1 | 2              | 1                               |
| CASSFGDEQYFGPGT      | 2S7 | 2              | 1                               |
| CASSGGAEQFFGPG       | 2S1 | 2              | 1                               |
| CASSLGGAPLFGEG       | 1S5 | 2              | 1                               |
| CASSLTGEQYFGPGT      | 2S7 | 2              | 1                               |
| CASSPGAEQFFGPG       | 2S1 | 2              | 1                               |
| CASSQGEAPLFGEG       | 1S5 | 2              | 1                               |
| CASSTGQAPLFGEG       | 1S5 | 2              | 1                               |
| CASSWGAEQFFGPG       | 2S1 | 2              | 1                               |
| CASSWGAEQYFGPGT      | 2S7 | 2              | 1                               |
