# Supplementary material
Source: PubMed Central journal article supplement (PMC1693724)
Supplement: pnas_0608907103_2.pdf [file pnas_0608907103_2.pdf]

| CDR3 $\beta$ region |     |     |     |                             |                           |     |         |          |                 | D $\beta$ | Number of mice bearing n.t. sequence | Number of n.t. additions | Number of possible alignments |
|---------------------|-----|-----|-----|-----------------------------|---------------------------|-----|---------|----------|-----------------|-----------|--------------------------------------|--------------------------|-------------------------------|
| C                   | A   | S   | S   | G                           | G                         | S   | N       | T        |                 |           |                                      |                          |                               |
| tgt                 | gcc | agc | agt | ggc                         | ggg                       | tcg | aac     | acc      | gggacagggggc    | 1         | 5                                    | 10                       |                               |
|                     |     |     | agt | ggc                         | ggg                       | tcg | gggaca  | gggggc   |                 |           |                                      |                          |                               |
|                     |     |     | agt | ggc                         | ggg                       | tcg | gggacag | ggggc    |                 |           |                                      |                          |                               |
|                     |     |     | agt | ggc                         | ggg                       | tcg | gggacag | ggggc    |                 |           |                                      |                          |                               |
|                     |     |     | agt | ggc                         | ggg                       | tcg | gggact  | gggggggc |                 |           |                                      |                          |                               |
|                     |     |     | agt | ggc                         | ggg                       | tcg | gggact  | gggggggc |                 |           |                                      |                          |                               |
|                     |     |     | agt | ggc                         | ggg                       | tcg | gggact  | gggggggc |                 |           |                                      |                          |                               |
|                     |     |     | agt | ggc                         | ggg                       | tcg | gggact  | gggggggc |                 |           |                                      |                          |                               |
|                     |     |     | agt | ggc                         | ggg                       | tcg | gggact  | gggggggc |                 |           |                                      |                          |                               |
| tgt                 | gcc | agc | agc | ggg                         | ggg                       | agt | aac     | acc      | gggact          | 1         | 4                                    | 2                        |                               |
|                     |     |     | agc | ggg                         | ggg                       | agt | gggact  | gggggggc |                 |           |                                      |                          |                               |
| tgt                 | gcc | agc | fcc | ggg                         | ggc                       | cca | aac     | acc      | gggaca          | 1         | 4                                    | 2                        |                               |
|                     |     |     | fcc | ggg                         | ggc                       | cca | gggact  | gggggggc |                 |           |                                      |                          |                               |
| tgt                 | gcc | agc | agt | gga                         | ggi                       | cca | aac     | acc      | gggacagggggc    | 1         | 3                                    | 1                        |                               |
|                     |     |     | agt | ggt                         | ggi                       | cca | aac     | acc      | gggact          |           |                                      |                          | gggggggc                      |
|                     |     |     | cca | ggg                         | gga                       | cca | aac     | acc      | gggacagggggc    |           |                                      |                          |                               |
|                     |     |     | tcg | ggg                         | ggg                       | cca | aac     | acc      | gggact          |           |                                      |                          | gggggggc                      |
|                     |     |     | agt | ggc                         | ggg                       | cca | aac     | acc      | gggacagggggc    |           |                                      |                          |                               |
|                     |     |     | agt | ggc                         | ggg                       | cca | aac     | acc      | gggacagggggc    |           |                                      |                          |                               |
|                     |     |     | agt | ggc                         | ggg                       | cca | aac     | acc      | gggacagggggc    |           |                                      |                          |                               |
|                     |     |     | agt | ggc                         | ggg                       | cca | aac     | acc      | gggact          |           |                                      |                          | gggggggc                      |
|                     |     |     | agt | ggc                         | ggg                       | cca | aac     | acc      | gggact          |           |                                      |                          | gggggggc                      |
|                     |     |     | agt | ggc                         | ggg                       | cca | aac     | acc      | gggact          |           |                                      |                          | gggggggc                      |
|                     |     |     | agt | ggc                         | ggg                       | cca | aac     | acc      | gggact          |           |                                      |                          | gggggggc                      |
|                     |     |     | agt | ggc                         | ggg                       | cca | aac     | acc      | gggact          |           |                                      |                          | gggggggc                      |
|                     |     |     | agt | ggc                         | ggg                       | cca | aac     | acc      | gggact          |           |                                      |                          | gggggggc                      |
|                     |     |     | agt | ggc                         | ggg                       | cca | aac     | acc      | gggact          |           |                                      |                          | gggggggc                      |
| tgt                 | gcc | agc | agt | gga                         | ggg                       | cca | aac     | acc      | gggacagggggc    | 1         | 2                                    | 1                        |                               |
|                     |     |     | ctt | ggg                         | ggg                       | cca | aac     | acc      | gggact          |           |                                      |                          | gggggggc                      |
|                     |     |     | agc | ggg                         | ggg                       | cca | aac     | acc      | gggact          |           |                                      |                          | gggggggc                      |
|                     |     |     | agc | ggg                         | ggg                       | cca | aac     | acc      | gggact          |           |                                      |                          | gggggggc                      |
|                     |     |     | agt | ggg                         | ggi                       | cca | aac     | acc      | gggaca          |           |                                      |                          | gggggc                        |
|                     |     |     | agt | ggg                         | ggi                       | cca | aac     | acc      | gggacag         |           |                                      |                          | ggggc                         |
|                     |     |     | agt | ggg                         | ggi                       | cca | aac     | acc      | gggact          |           |                                      |                          | gggggggc                      |
|                     |     |     | agt | ggg                         | ggi                       | cca | aac     | acc      | gggact          |           |                                      |                          | gggggggc                      |
|                     |     |     | agt | ggg                         | ggi                       | cca | aac     | acc      | gggact          |           |                                      |                          | gggggggc                      |
|                     |     |     | agt | ggg                         | ggi                       | cca | aac     | acc      | gggact          |           |                                      |                          | gggggggc                      |
|                     |     |     | agt | ggg                         | ggi                       | cca | aac     | acc      | gggact          |           |                                      |                          | gggggggc                      |
|                     |     |     | agt | ggg                         | ggi                       | cca | aac     | acc      | gggact          |           |                                      |                          | gggggggc                      |
|                     |     |     | agt | ggg                         | ggi                       | cca | aac     | acc      | gggact          |           |                                      |                          | gggggggc                      |
|                     |     |     | agt | ggg                         | ggi                       | cca | aac     | acc      | gggact          |           |                                      |                          | gggggggc                      |
| tgt                 | gcc | agc | agt | ggg                         | gga                       | cca | aac     | acc      | gggacagggggc    | 4         | 2                                    | 13                       |                               |
|                     |     |     | agt | ggg                         | gga                       | cca | aac     | acc      | gggact          |           |                                      |                          | gggggggc                      |
|                     |     |     | agt | ggg                         | gga                       | cca | aac     | acc      | gggaca          |           |                                      |                          | gggggc                        |
|                     |     |     | agt | ggg                         | gga                       | cca | aac     | acc      | gggacag         |           |                                      |                          | ggggc                         |
|                     |     |     | agt | ggg                         | gga                       | cca | aac     | acc      | gggact          |           |                                      |                          | gggggggc                      |
|                     |     |     | agt | ggg                         | gga                       | cca | aac     | acc      | gggact          |           |                                      |                          | gggggggc                      |
|                     |     |     | agt | ggg                         | gga                       | cca | aac     | acc      | gggact          |           |                                      |                          | gggggggc                      |
|                     |     |     | agt | ggg                         | gga                       | cca | aac     | acc      | gggact          |           |                                      |                          | gggggggc                      |
|                     |     |     | agt | ggg                         | gga                       | cca | aac     | acc      | gggact          |           |                                      |                          | gggggggc                      |
|                     |     |     | agt | ggg                         | gga                       | cca | aac     | acc      | gggact          |           |                                      |                          | gggggggc                      |
|                     |     |     | agt | ggg                         | gga                       | cca | aac     | acc      | gggact          |           |                                      |                          | gggggggc                      |
|                     |     |     | agt | ggg                         | gga                       | cca | aac     | acc      | gggact          |           |                                      |                          | gggggggc                      |
|                     |     |     | agt | ggg                         | gga                       | cca | aac     | acc      | gggact          |           |                                      |                          | gggggggc                      |
|                     |     |     | agt | ggg                         | gga                       | cca | aac     | acc      | gggact          |           |                                      |                          | gggggggc                      |
| tgt                 | gcc | agc | agt | ggg                         | ggc                       | cca | aac     | acc      | gggacagggggc    | 4         | 1                                    | 4                        |                               |
|                     |     |     | agt | ggg                         | ggc                       | cca | aac     | acc      | gggact          |           |                                      |                          | gggggggc                      |
|                     |     |     | agt | ggg                         | ggc                       | cca | aac     | acc      | gggaca          |           |                                      |                          | gggggc                        |
|                     |     |     | agt | ggg                         | ggc                       | cca | aac     | acc      | gggact          |           |                                      |                          | gggggggc                      |
| tgt                 | gcc | agc | agt | ggg                         | ggg                       | cca | aac     | acc      | gggaca          | 11        | 1                                    | 7                        |                               |
|                     |     |     | agt | ggg                         | ggg                       | cca | aac     | acc      | gggact          |           |                                      |                          | gggggggc                      |
|                     |     |     | agt | ggg                         | ggg                       | cca | aac     | acc      | gggact          |           |                                      |                          | gggggggc                      |
|                     |     |     | agt | ggg                         | ggg                       | cca | aac     | acc      | gggact          |           |                                      |                          | gggggggc                      |
|                     |     |     | agt | ggg                         | ggg                       | cca | aac     | acc      | gggact          |           |                                      |                          | gggggggc                      |
|                     |     |     | agt | ggg                         | ggg                       | cca | aac     | acc      | gggact          |           |                                      |                          | gggggggc                      |
| (V $\beta$ 8.3)     | tgt | gcc | agc | agt                         | gat                       | ca  | aac     | acc      | (J $\beta$ 2S2) | }         | germline                             |                          |                               |
|                     |     |     |     | gggacagggggc/gggactgggggggc | (D $\beta$ 1/D $\beta$ 2) |     |         |          |                 |           |                                      |                          |                               |
