# Supplementary material
Source: PubMed Central journal article supplement (PMC1693724)
Supplement: pnas_0608907103_3.pdf [file pnas_0608907103_3.pdf]

| CDR3 $\beta$ region |     |     |     |     |     |     |     |     | D $\beta$      | Number of nucleotide additions | Number of mice bearing n.t. sequence       |
|---------------------|-----|-----|-----|-----|-----|-----|-----|-----|----------------|--------------------------------|--------------------------------------------|
| C                   | A   | S   | S   | G   | G   | S   | N   | T   |                |                                |                                            |
| tgt                 | gcc | agc | agt | ggg | ggg | ica | aac | acc | gggactgggggggc | 1                              | 11                                         |
| tgt                 | gcc | agc | agt | ggg | ggg | ica | aac | acc | gggactgggggggc | 1                              | 11                                         |
| tgt                 | gcc | agc | agt | ggg | ggg | ica | aac | acc | gggactgggggggc | 1                              | 11                                         |
| tgt                 | gcc | agc | agt | ggg | ggg | ica | aac | acc | gggactgggggggc | 1                              | 11                                         |
| tgt                 | gcc | agc | agt | ggg | ggg | ica | aac | acc | gggactgggggggc | 2                              | 11                                         |
| tgt                 | gcc | agc | agt | ggg | ggg | ica | aac | acc | gggactgggggggc | 2                              | 11                                         |
| tgt                 | gcc | agc | agt | ggg | ggg | ica | aac | acc | gggacagggggc   | 3                              | 11                                         |
| tgt                 | gcc | agc | agt | ggg | ggg | ica | aac | acc | gggacagggggc   | 3                              | 11                                         |
| tgt                 | gcc | agc | agt | ggg | ggg | ica | aac | acc | gggacagggggc   | 3                              | 11                                         |
| tgt                 | gcc | agc | agt | ggg | ggg | ica | aac | acc | gggactgggggggc | 3                              | 11                                         |
| tgt                 | gcc | agc | agt | ggg | ggg | ica | aac | acc | gggactgggggggc | 3                              | 11                                         |
| tgt                 | gcc | agc | agt | ggg | ggg | ica | aac | acc | gggactgggggggc | 3                              | 11                                         |
| tgt                 | gcc | agc | agt | ggg | ggg | ica | aac | acc | gggacagggggc   | 4                              | 11                                         |
| tgt                 | gcc | agc | agt | ggg | ggg | ica | aac | acc | gggactgggggggc | 5                              | 11                                         |
| tgt                 | gcc | agc | agt | ggg | ggc | ica | aac | acc | gggacagggggc   | 1                              | 4                                          |
| tgt                 | gcc | agc | agt | ggg | ggc | ica | aac | acc | gggactgggggggc | 1                              | 4                                          |
| tgt                 | gcc | agc | agt | ggg | ggc | ica | aac | acc | gggacagggggc   | 1                              | 4                                          |
| tgt                 | gcc | agc | agt | ggg | ggc | ica | aac | acc | gggactgggggggc | 1                              | 4                                          |
| tgt                 | gcc | agc | agt | ggg | ggc | ica | aac | acc | gggactgggggggc | 2                              | 4                                          |
| tgt                 | gcc | agc | agt | ggg | ggc | ica | aac | acc | gggactgggggggc | 2                              | 4                                          |
| tgt                 | gcc | agc | agt | ggg | ggc | ica | aac | acc | gggacagggggc   | 2                              | 4                                          |
| tgt                 | gcc | agc | agt | ggg | ggc | ica | aac | acc | gggactgggggggc | 3                              | 4                                          |
| tgt                 | gcc | agc | agt | ggg | ggc | ica | aac | acc | gggacagggggc   | 4                              | 4                                          |
| tgt                 | gcc | agc | agt | ggg | gga | ica | aac | acc | gggactgggggggc | 2                              | 4                                          |
| tgt                 | gcc | agc | agt | ggg | gga | ica | aac | acc | gggacagggggc   | 3                              | 4                                          |
| tgt                 | gcc | agc | agt | ggg | gga | ica | aac | acc | gggactgggggggc | 3                              | 4                                          |
| tgt                 | gcc | agc | agt | ggg | gga | ica | aac | acc | gggacagggggc   | 3                              | 4                                          |
| tgt                 | gcc | agc | agt | ggg | gga | ica | aac | acc | gggactgggggggc | 4                              | 4                                          |
| tgt                 | gcc | agc | agt | ggg | ggt | ica | aac | acc | gggacagggggc   | 2                              | 3                                          |
| tgt                 | gcc | agc | agt | ggg | ggt | ica | aac | acc | gggactgggggggc | 2                              | 3                                          |
| tgt                 | gcc | agc | agt | ggg | ggt | ica | aac | acc | gggactgggggggc | 2                              | 3                                          |
| tgt                 | gcc | agc | agt | ggg | ggt | ica | aac | acc | gggacagggggc   | 3                              | 3                                          |
| tgt                 | gcc | agc | agt | ggg | ggt | ica | aac | acc | gggactgggggggc | 3                              | 3                                          |
| tgt                 | gcc | agc | agt | ggg | ggt | ica | aac | acc | gggacagggggc   | 3                              | 3                                          |
| tgt                 | gcc | agc | agt | ggg | ggt | ica | aac | acc | gggactgggggggc | 3                              | 3                                          |
| tgt                 | gcc | agc | agt | ggg | ggt | ica | aac | acc | gggactgggggggc | 4                              | 3                                          |
| tgt                 | gcc | agc | agt | ggg | ggt | ica | aac | acc | gggactgggggggc | 6                              | 3                                          |
| tgt                 | gcc | agc | agc | ggg | ggg | ica | aac | acc | gggactgggggggc | 5                              | 2                                          |
| tgt                 | gcc | agc | agt | ggc | ggg | ica | aac | acc | gggacagggggc   | 3                              | 1                                          |
| tgt                 | gcc | agc | agt | ggc | ggg | ica | aac | acc | gggacagggggc   | 4                              | 1                                          |
| tgt                 | gcc | agc | agt | gga | ggt | ica | aac | acc | gggacagggggc   | 5                              | 1                                          |
| tgt                 | gcc | agc | agt | ggg | ggg | agc | aac | acc | gggactgggggggc | 4                              | n.t. sequences not observed in experiments |
| tgt                 | gcc | agc | agt | ggg | ggg | agc | aac | acc | gggactgggggggc | 4                              |                                            |
| tgt                 | gcc | agc | agt | ggg | ggg | agc | aac | acc | gggactgggggggc | 5                              |                                            |
| tgt                 | gcc | agc | agt | ggg | ggg | icg | aac | acc | gggactgggggggc | 3                              |                                            |
| tgt                 | gcc | agc | agt | ggg | ggg | icg | aac | acc | gggactgggggggc | 4                              |                                            |
| tgt                 | gcc | agc | agt | ggc | ggc | ica | aac | acc | gggactgggggggc | 4                              |                                            |
| tgt                 | gcc | agc | agt | ggc | ggc | ica | aac | acc | gggactgggggggc | 6                              |                                            |
| tgt                 | gcc | agc | agc | ggg | ggc | ica | aac | acc | gggacagggggc   | 3                              |                                            |
| tgt                 | gcc | agc | agt | gga | ggc | ica | aac | acc | gggactgggggggc | 3                              |                                            |
| tgt                 | gcc | agc | agc | ggg | ggt | ica | aac | acc | gggactgggggggc | 3                              |                                            |
| tgt                 | gcc | agc | agt | ggg | ggg | agt | aac | acc | gggactgggggggc | 3                              |                                            |
| tgt                 | gcc | agc | agt | ggg | ggg | ict | aac | acc | gggactgggggggc | 3                              |                                            |
| tgt                 | gcc | agc | agt | ggc | ggt | ica | aac | acc | gggactgggggggc | 4                              |                                            |
| tgt                 | gcc | agc | agc | ggg | gga | ica | aac | acc | gggactgggggggc | 4                              |                                            |
| tgt                 | gcc | agc | ica | ggg | ggt | ica | aac | acc | gggacagggggc   | 4                              |                                            |
| tgt                 | gcc | agt | ica | ggg | ggc | ica | aac | acc | gggacagggggc   | 4                              |                                            |
| tgt                 | gcc | agc | agt | gga | gga | ica | aac | acc | gggactgggggggc | 5                              |                                            |
| tgt                 | gcc | agc | agt | ggg | gga | agt | aac | acc | gggacagggggc   | 5                              |                                            |
| tgt                 | gcc | agc | agt | ggg | ggg | icc | aac | acc | gggacagggggc   | 5                              |                                            |
| tgt                 | gcc | agc | agt | ggg | ggc | icg | aac | acc | gggacagggggc   | 6                              |                                            |
| tgt                 | gcc | agc | agt | ggt | ggg | ica | aac | acc | gggacagggggc   | 6                              |                                            |

(V $\beta$ 8.3) } germline  
 gggacagggggc/gggactggggggc (D $\beta$ 1/D $\beta$ 2) (J $\beta$ 2S2)
