# Supplementary material
Source: PubMed Central journal article supplement (PMC1693724)
Supplement: pnas_0608907103_5.pdf [file pnas_0608907103_5.pdf]

Germline sequences

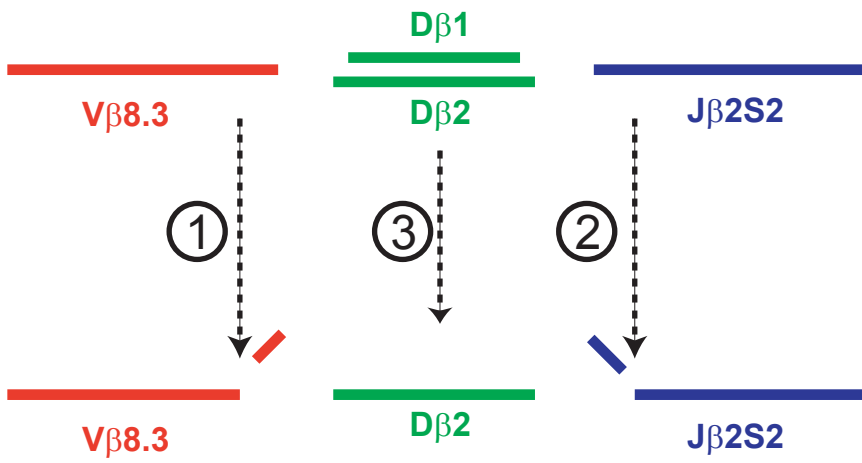

1. Trim V $\beta$  (0 to 10 nt)
2. Trim J $\beta$  (0 to 10 nt)
3. Choose D $\beta$ 1 / D $\beta$ 2

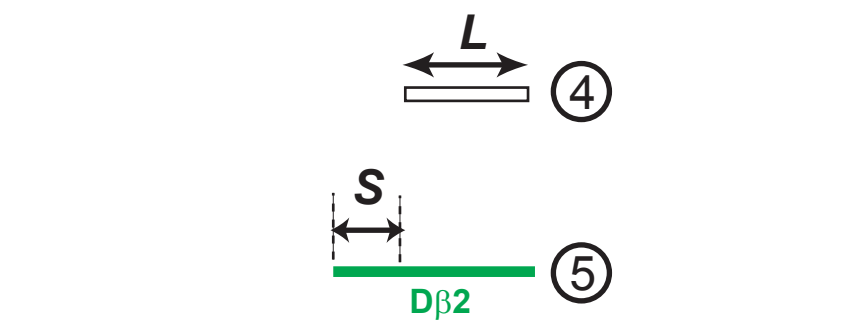

4. Choose length of D $\beta$  fragment ' $L$ ' (0 to 14 nt)
5. Choose starting position of D $\beta$  fragment ' $S$ ' (0 to [14 -  $L$ ] from 5' end)

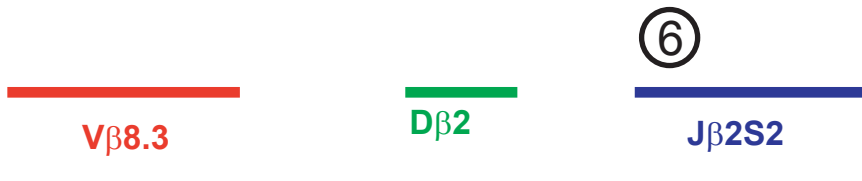

6. Trimmed germline sequences

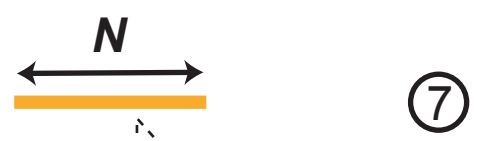

7. Choose combined length of random nucleotide insertion ' $N$ ' (0 to 10 nt)

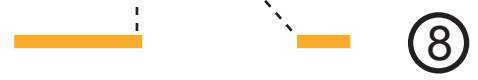

8. Divide insertion between V $\beta$  / D $\beta$  and D $\beta$  / J $\beta$  joints (0 to  $N$ )

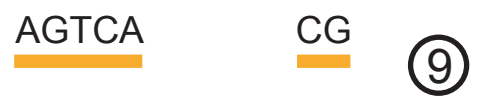

9. Choose DNA bases of random nucleotide additions

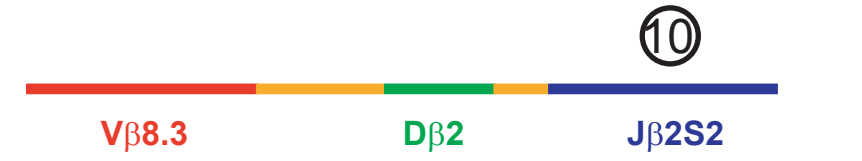

10. Join segments together
