# Supplementary material
Source: PubMed Central journal article supplement (PMC1693724)

A

Naive V $\beta$  8.3 CD8<sup>+</sup> T cells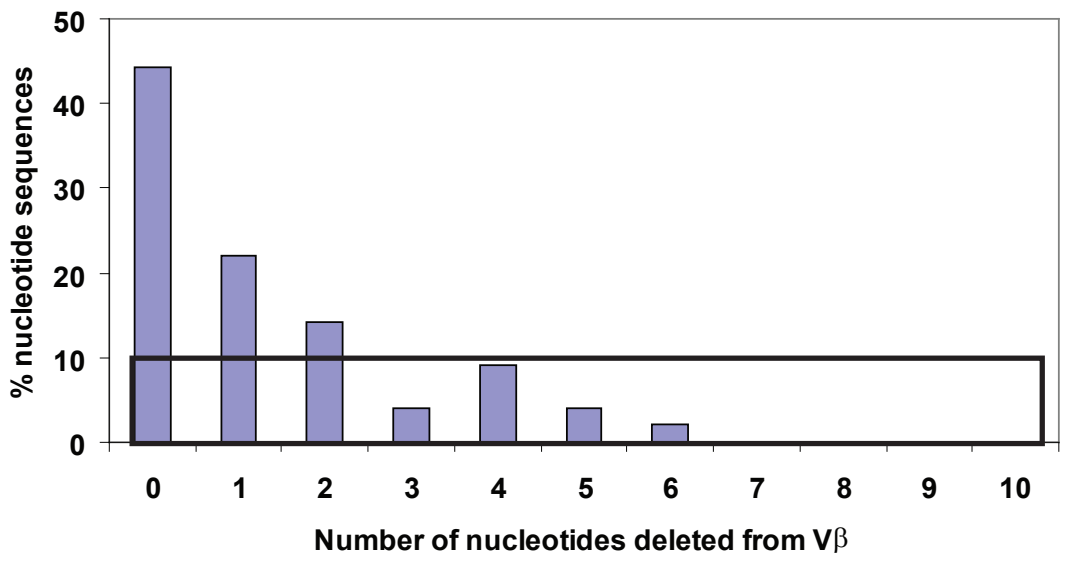

B

Naive V $\beta$  8.3 CD8<sup>+</sup> T cells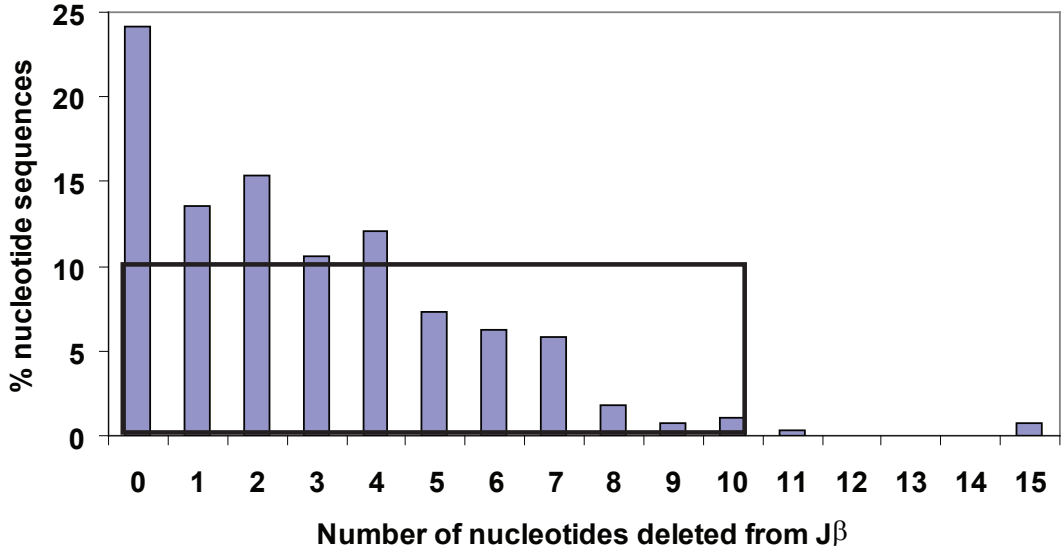

C

Naive V $\beta$  8.3 CD8<sup>+</sup> T cells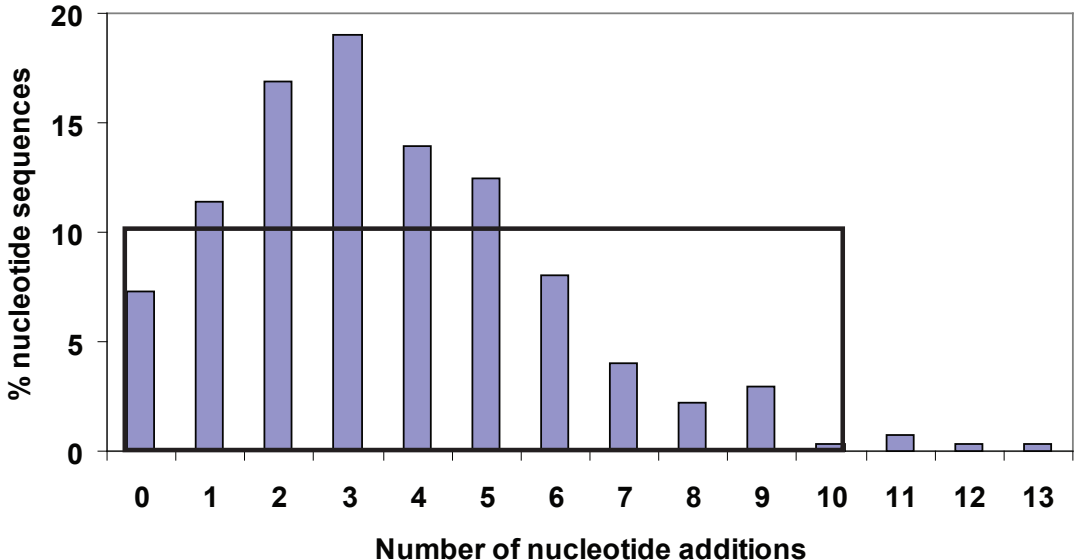

Supplement: pnas_0608907103_6.pdf [file pnas_0608907103_6.pdf]
